# Supplementary material for: Very Long-Chain C24:1 Ceramide Is Increased in Serum Extracellular Vesicles with Aging and Can Induce Senescence in Bone-Derived Mesenchymal Stem Cells
Source: MDPI journal article supplement (doi:10.3390/cells8010037), 2019-01-10

$\beta$ -gal assay performed on BMSCs following treatment with vehicle solution or C24:1 ceramide solution processed as solution with loaded exosomes (centrifugation, precipitation, followed by centrifugation)

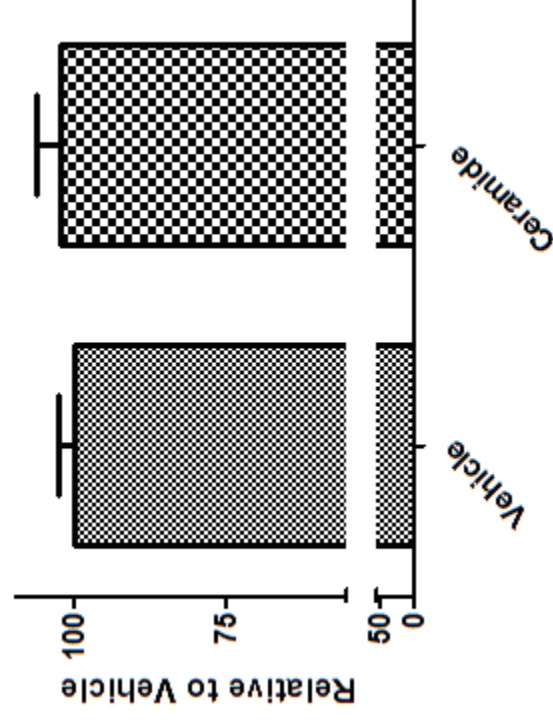

Supplement: s1 [file s1]
